# Supplementary material for: The cell adhesion molecule Fasciclin2 regulates brush border length and organization in Drosophila renal tubules
Source: PubMed Central journal article supplement (PMC4833865; doi:10.1038/ncomms11266), 2016-04-13
Supplement: ncomms11266-s1.pdf [file ncomms11266-s1.pdf]

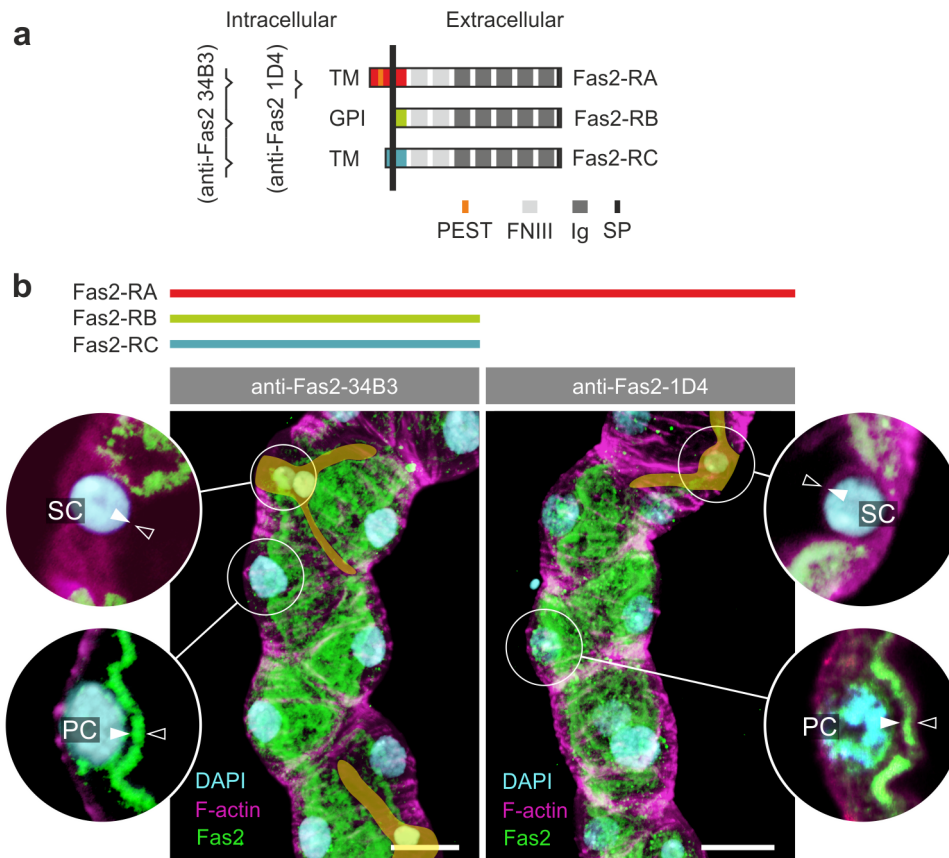

**Supplementary Figure 1 | Immunocytochemical localization of Fas2.** (a) Schematic representation of the dominant Fas2 isoforms and their functional domains. The Fas2 isoforms recognized by each anti-Fas2 antibody is indicated by arrows. SP, signal peptide; PEST, PEST domain. (b) Fas2 is shown to localize to the apical brush border (arrows) of principal cells (PC), but not stellate cells (SC), of adult WT (Canton S) MTs using the monoclonal anti-Fas2 antibodies 1D4 and 34B3. SCs are marked in yellow. This is consistent with that reported by the *Fas2* protein trap insertion lines. Inserts represent single optical sections of the selected regions. Scale bars, 25  $\mu$ m.

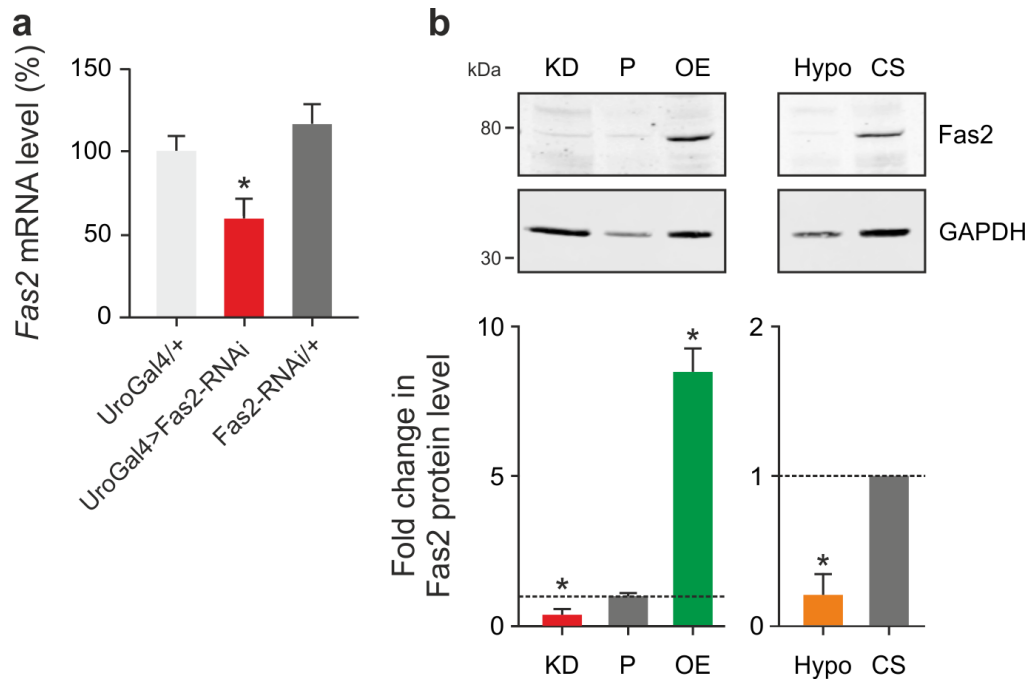

**Supplementary Figure 2 | Validation of *Fas2* expression and protein levels. (a)** Expression of *Fas2* mRNA levels was normalized against the housekeeping gene *alpha-tubulin*, and values expressed as mean percent change  $\pm$  s.e.m. compared to parental controls ( $N=3$ ). The observed difference in sample quantity corresponds to >40% knockdown, which is significantly different (\*, one-way ANOVA,  $P<0.05$ ) from both parental controls. **(b)** Western blot analysis confirmed these results on a protein level, further showing a >0.6 fold knockdown (KD, UroGal4>Fas2-RNAi) and a >8 fold increase (OE, UroGal4>Fas2-EP) in *Fas2* protein levels compared to parental (P, UroGal4). Furthermore, the hypomorph (Hypo, Fas2-EB<sup>112</sup>) showed a >0.8 fold decrease in *Fas2* protein compared to Canton S (CS). *Fas2* protein levels were normalized against the housekeeping protein GAPDH, and values expressed as fold change relative to either parental (P) or Canton S (CS).

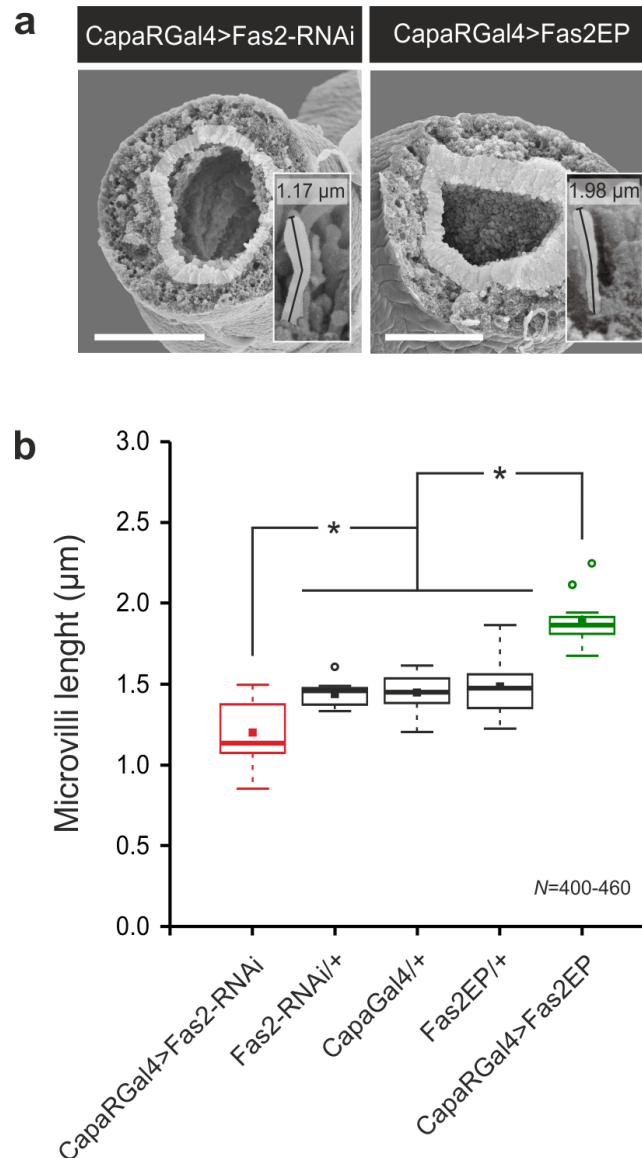

**Supplementary Figure 3 | Genetic manipulation of *Fas2* expression impacts microvilli length.** **(a)** SEM analysis of MT cross-sections (main segment) from adult *Drosophila* using the principal cell specific CapaRGal4 driver to drive both RNAi and overexpressor constructs. Individual microvilli were measured (see insert) from ( $N=10-13$ ) cross-sections with ( $N=400-460$ ) microvilli measured in total for each *Fas2* genetic background. Scale bars,  $20\ \mu\text{m}$ . **(b)** Tukey boxplots of microvilli length from the different *Fas2* genetic backgrounds. Genetic manipulations of *Fas2* expression levels significantly change (\*, one-way ANOVA,  $P<0.05$ ) microvilli length compared to parental controls, and importantly reiterates the data obtained using the separate principal cell-specific UroGal4 driver. Solid squares indicate mean values; open circles symbolize data outliers.

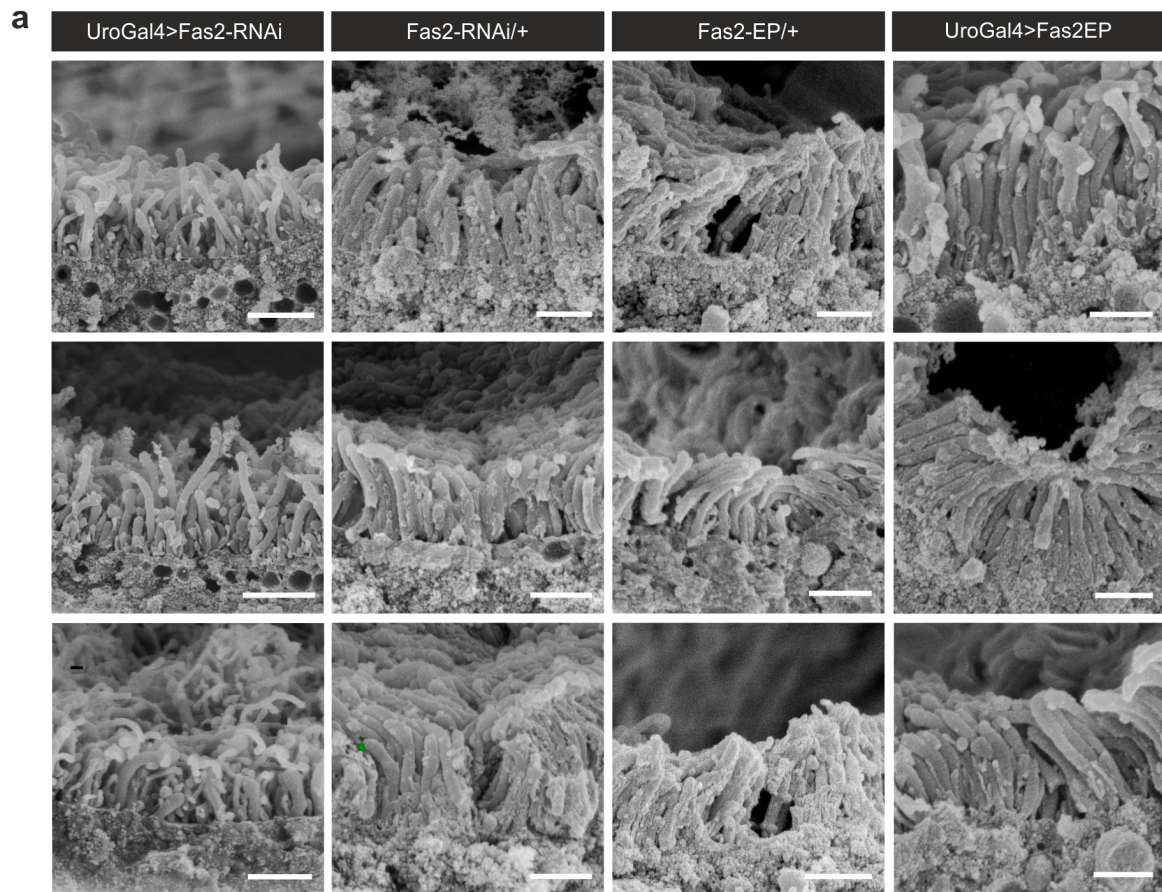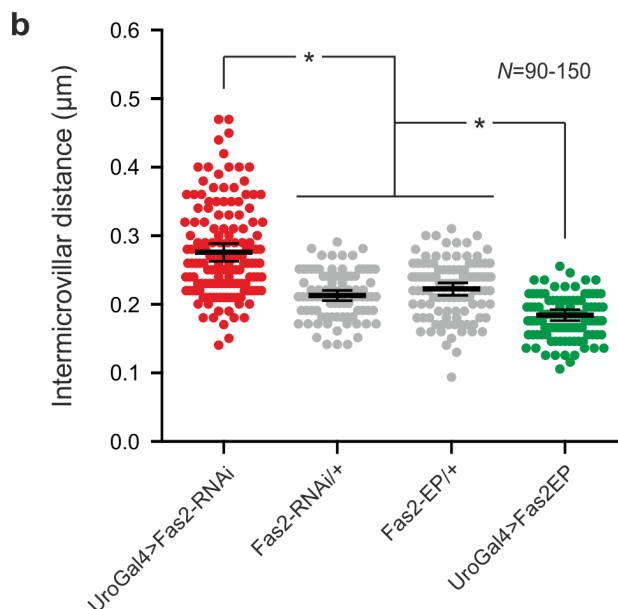

**Supplementary Figure 4 | *Fas2* expression impacts brush border organisation. (a)** SEM analysis of MT cross-sections (main segment) from adult *Drosophila* using the principal cell specific UroGal4 driver to drive both RNAi and overexpressor constructs. Scale bars, 1 µm. **(b)** Raw data of the quantification of intermicrovillar distance with superimposed mean  $\pm$  s.e.m. in each group. \*, one-way ANOVA,  $P < 0.05$ .

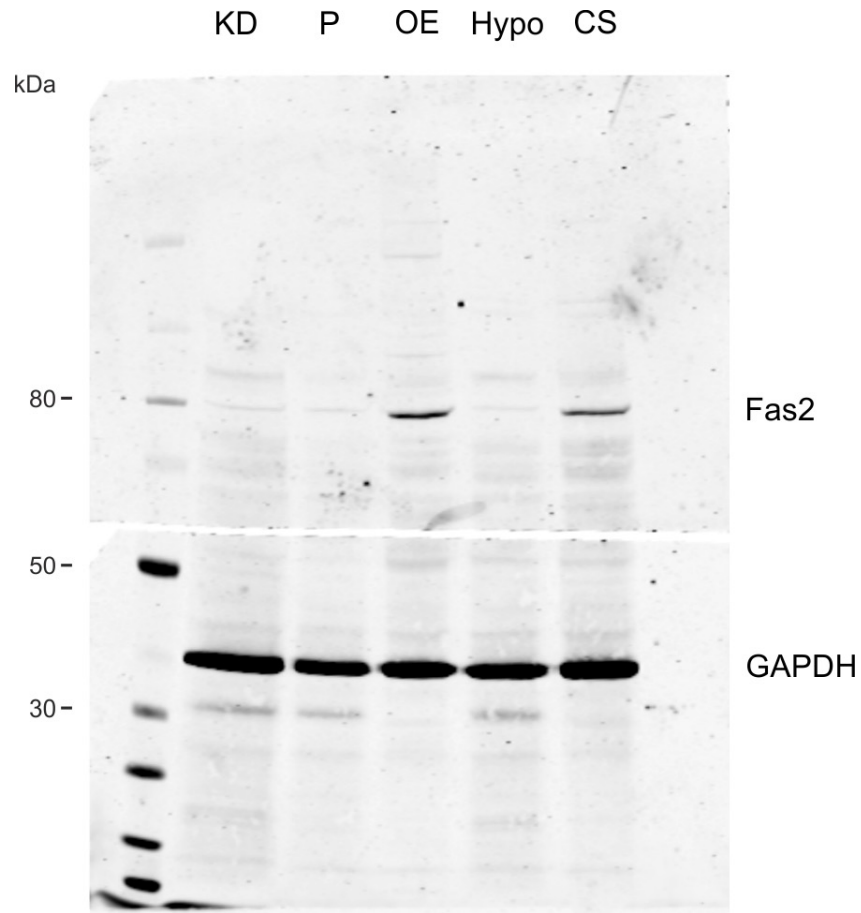

**Supplementary Figure 5 | Western blot analysis of Fas2 expression.** Full scan of western blot used as example in Supplementary Fig. 2b. KD, UroGal4>Fas2-RNAi; P, UroGal4; OE, UroGal4>Fas2-EP; Hypo, Fas2-EB<sup>112</sup>; Canton S, CS. Fas2 protein levels were normalized against the housekeeping protein GAPDH, and values expressed as fold change relative to either parental (P) or wild type (CS).
